# Supplementary material for: Determinants of Intention to Use Mobile Phone Caller Tunes to Promote Voluntary Blood Donation: Cross-Sectional Study
Source: PubMed Central journal article supplement (PMC5960044; doi:10.2196/mhealth.9752), 2018-05-04
Supplement: mhealth_v6i5e117_app1.pdf [file mhealth_v6i5e117_app1.pdf]

## Multimedia Appendix 1: Operationalization of constructs

### Operationalization of constructs

| <b>Construct</b>                            | <b>Item</b> | <b>Item statement</b>                                                                                          | <b>Reference from which item was adapted</b> |
|---------------------------------------------|-------------|----------------------------------------------------------------------------------------------------------------|----------------------------------------------|
| Perceived Ease of Use (with caller tune)    | PEU1        | I found caller tune easy to download                                                                           | [39,54]                                      |
|                                             | PEU2        | Learning to download caller tune was easy                                                                      | [31,38]                                      |
|                                             | PEU3        | Using caller tune is easy                                                                                      | [34,55]                                      |
|                                             | PEU4        | Instruction for getting the caller tune is clear and understandable                                            | [31,56]                                      |
|                                             | PEU5        | It is easy to get caller tune from my mobile telecom operator                                                  | [39,54]                                      |
|                                             | PEU6        | It is easy for my phone to download a caller tune                                                              | [31,56]                                      |
|                                             | PEU7        | It is easy to remember how to download a caller tune                                                           | [39]                                         |
|                                             |             |                                                                                                                |                                              |
| Perceived Ease of Use (with no caller tune) | PEU1        | I think it would be easy to download caller tune                                                               | [31,38]                                      |
|                                             | PEU2        | I believe that the instruction for downloading the caller tune would be clear and easy to understand           | [31,56]                                      |
|                                             | PEU3        | I think that caller tune is a flexible technology to interact with                                             | [31,40]                                      |
|                                             |             |                                                                                                                |                                              |
| Perceived Usefulness of Caller Tunes        | PUBD1       | Using caller tunes for promoting blood donation would increase voluntary blood donation                        | [31,38]                                      |
|                                             | PUBD2       | Using caller tunes for promoting blood donation would lead to first time donors becoming repeat blood donors   | [31,38]                                      |
|                                             | PUBD3       | Using caller tunes for promoting blood donation would lead to family blood donors becoming repeat blood donors | [31,38]                                      |

|                                |         |                                                                                      |         |
|--------------------------------|---------|--------------------------------------------------------------------------------------|---------|
|                                |         |                                                                                      |         |
| Attitude to Using Caller Tunes | BDA1    | I think it is a good idea to use caller tunes to encourage blood donation            | [31,57] |
|                                | BDA2    | I find it interesting to use caller tunes for making others become blood donors      | [57]    |
|                                | BDA3    | I would feel great using caller tunes for making more people become blood donors     | [57]    |
|                                | BDA4    | In my opinion, the use of caller tunes will have a positive impact on blood donation | [31,54] |
|                                |         |                                                                                      |         |
| Intention to Use               | IUBD    | I intend to use caller tunes for promoting blood donation                            | [54,55] |
|                                |         |                                                                                      |         |
| Free to Download Caller Tunes  | CFDBD 1 | Mobile telecommunication network makes it free to download                           | [44]    |
