# Supplementary material for: Determinants of Intention to Use Mobile Phone Caller Tunes to Promote Voluntary Blood Donation: Cross-Sectional Study
Source: PubMed Central journal article supplement (PMC5960044; doi:10.2196/mhealth.9752), 2018-05-04
Supplement: mhealth_v6i5e117_app2.pdf [file mhealth_v6i5e117_app2.pdf]

## Multimedia Appendix 2: Supplementary questionnaire focusing only on blood donation and caller tunes

1. Have you ever donated blood?

- No
- Yes

2. Will you be donating blood today?

- No
- Yes

3. Do you have a mobile phone?

- No
- Yes

4. Does your mobile phone have a caller tune?

- No
- Yes

5. What type of caller tune do you have?

- Song
- Message
- Both song and message

| <b>Perceived Ease of Use</b>                                           | <b>Strongly agree</b> | <b>Agree</b> | <b>Slightly Agree</b> | <b>Neither agree nor disagree</b> | <b>Slightly Disagree</b> | <b>Disagree</b> | <b>Strongly disagree</b> |
|------------------------------------------------------------------------|-----------------------|--------------|-----------------------|-----------------------------------|--------------------------|-----------------|--------------------------|
| 6. I found caller tune easy to download                                | 1                     | 2            | 3                     | 4                                 | 5                        | 6               | 7                        |
| 7. Learning to download caller tune was easy                           | 1                     | 2            | 3                     | 4                                 | 5                        | 6               | 7                        |
| 8. Using caller tune is easy                                           | 1                     | 2            | 3                     | 4                                 | 5                        | 6               | 7                        |
| 9. Instruction for getting the caller tune is clear and understandable | 1                     | 2            | 3                     | 4                                 | 5                        | 6               | 7                        |
| 10. It is easy to get caller tune from my mobile telecom operator      | 1                     | 2            | 3                     | 4                                 | 5                        | 6               | 7                        |
| 11. It is easy for my phone to download a caller tune                  | 1                     | 2            | 3                     | 4                                 | 5                        | 6               | 7                        |
| 12. It is easy to remember how to download a caller tune.              | 1                     | 2            | 3                     | 4                                 | 5                        | 6               | 7                        |

| <b>Perceived Ease of Use for respondents with no caller tune</b>                                         | <b>Strongly agree</b> | <b>Agree</b> | <b>Slightly Agree</b> | <b>Neither agree nor disagree</b> | <b>Slightly Disagree</b> | <b>Disagree</b> | <b>Strongly disagree</b> |
|----------------------------------------------------------------------------------------------------------|-----------------------|--------------|-----------------------|-----------------------------------|--------------------------|-----------------|--------------------------|
| 13. I think it would be easy to download caller tune                                                     | 1                     | 2            | 3                     | 4                                 | 5                        | 6               | 7                        |
| 14. I believe that the instruction for downloading the caller tune would be clear and easy to understand | 1                     | 2            | 3                     | 4                                 | 5                        | 6               | 7                        |
| 15. I think that caller tune is a flexible technology to interact with                                   | 1                     | 2            | 3                     | 4                                 | 5                        | 6               | 7                        |

| <b>Perceived Usefulness<br/>(blood donation)</b>                                                                   | Strongly<br>agree | Agree | Slightly<br>Agree | Neither<br>agree<br>nor<br>disagree | Slightly<br>Disagree | Disagree | Strongly<br>disagree |
|--------------------------------------------------------------------------------------------------------------------|-------------------|-------|-------------------|-------------------------------------|----------------------|----------|----------------------|
| 16. Using caller tunes for promoting blood donation would increase voluntary blood donation                        | 1                 | 2     | 3                 | 4                                   | 5                    | 6        | 7                    |
| 17. Using caller tunes for promoting blood donation would lead to first time donors becoming repeat blood donors   | 1                 | 2     | 3                 | 4                                   | 5                    | 6        | 7                    |
| 18. Using caller tunes for promoting blood donation would lead to family blood donors becoming repeat blood donors | 1                 | 2     | 3                 | 4                                   | 5                    | 6        | 7                    |

| <b>Blood donation attitudes</b>                                                          | Strongl<br>y agree | Agree | Slightl<br>y<br>Agree | Neither<br>agree<br>nor<br>disagre<br>e | Slightly<br>Disagre<br>e | Disagre<br>e | Strongl<br>y<br>disagre<br>e |
|------------------------------------------------------------------------------------------|--------------------|-------|-----------------------|-----------------------------------------|--------------------------|--------------|------------------------------|
| 19. I think it is a good idea to use caller to encourage blood donation                  | 1                  | 2     | 3                     | 4                                       | 5                        | 6            | 7                            |
| 20. I find it interesting to use caller tunes for making others become blood donors      | 1                  | 2     | 3                     | 4                                       | 5                        | 6            | 7                            |
| 21. I would feel great using caller tunes for making more people become blood donors     | 1                  | 2     | 3                     | 4                                       | 5                        | 6            | 7                            |
| 22. In my opinion, the use of caller tunes will have a positive impact on blood donation | 1                  | 2     | 3                     | 4                                       | 5                        | 6            | 7                            |

| <b>Intentions</b>                                             | Strongly agree | Agree | Slightly Agree | Neither agree nor disagree | Slightly Disagree | Disagree | Strongly disagree |
|---------------------------------------------------------------|----------------|-------|----------------|----------------------------|-------------------|----------|-------------------|
| 23. I intend to use caller tunes for promoting blood donation | 1              | 2     | 3              | 4                          | 5                 | 6        | 7                 |

24. What are the considerations for designing, your adoption or non-adoption of caller tunes for health?

|                                                               | Strongly agree | Agree | Slightly Agree | Neither agree nor disagree | Slightly Disagree | Slightly Disagree | Strongly disagree |
|---------------------------------------------------------------|----------------|-------|----------------|----------------------------|-------------------|-------------------|-------------------|
| a. Mobile telecommunication network makes it free to download | 1              | 2     | 3              | 4                          | 5                 | 6                 | 7                 |

25. How old are you as of your last birthday?

- 20 or less
- 21-30
- 31-40
- 41-50
- 51-60
- More than 60

26. What is your gender?

- Male
- Female

27. What is the highest level of education?

- Primary
- Middle school
- JSS/Junior High School
- SSS/Senior High School
- Tertiary educational level
